# Supplementary material
Source: PubMed Central journal article supplement (PMC7105553)
Supplement: 10068_2019_677_MOESM1_ESM.pdf [file 10068_2019_677_MOESM1_ESM.pdf]

**Sup. 1** The primer design of cDNA for inflammatory gene

| Gene           | Forward                                | Reverse                                |
|----------------|----------------------------------------|----------------------------------------|
| iNOS           | 5'-CGTCCACAGTATCTGAGGATCAA-3'          | 5'-CAAGCAAGACTTGGACTTGCAA -3'          |
| COX-2          | 5'-CCCCACAGTCAAAGACACT -3'             | 5'-CTCATCACCCCACTCAGGAT-3'             |
| TRAF6          | 5'-GGAGGACAAGGTTGCCGAAAT-3'            | 5'-CCCAAAGTGGCCAATCTTCCAA-3'           |
| PPAR $\gamma$  | 5'-GACAGGAAAGACAACAGACAAATC-3'         | 5'-GGGGTGATGTGTTTGAAGTTG-3'            |
| MEK1           | 5'-GGCTGAACTACAGTGAAACCCTAGT<br>GAC-3' | 5'-GAGACACACACCACTAAGTATCCCA<br>CAC-3' |
| ERK1           | 5'-TATTGTGTAAC TTTTGTGGCTTTGGG-3'      | 5'-CCTCCTCTCAAATCTACACTGAGTG-<br>3'    |
| TNF- $\alpha$  | 5'-AGCCCCAGTCTGTATCCTT -3'             | 5'-GAGGCAACCTGACCACTCTC-3'             |
| IL-1 $\beta$   | 5'-GAAGTCAAGAGCAAAGTGG-3'              | 5'-ACAGTCCAGCCCATACTTT-3'              |
| IL-6           | 5'-CTGATGCTGGTGACAACCAC -3'            | 5'-TCCACGATTTCCCAGAGAAC-3'             |
| GAPDH          | 5'-AGCCACATCGCTCAGACAC-3'              | 5'-GCCAATACGACCAAATCC-3'               |
| $\beta$ -actin | 5'-ATCACTATTGGCAACGAGCG -3'            | 5'-TCAGCAATGGCTGGGTACAT-3'             |

**Sup. 2**  $^1\text{H}$  NMR at 298K in  $\text{CDCl}_3$

1) CLA

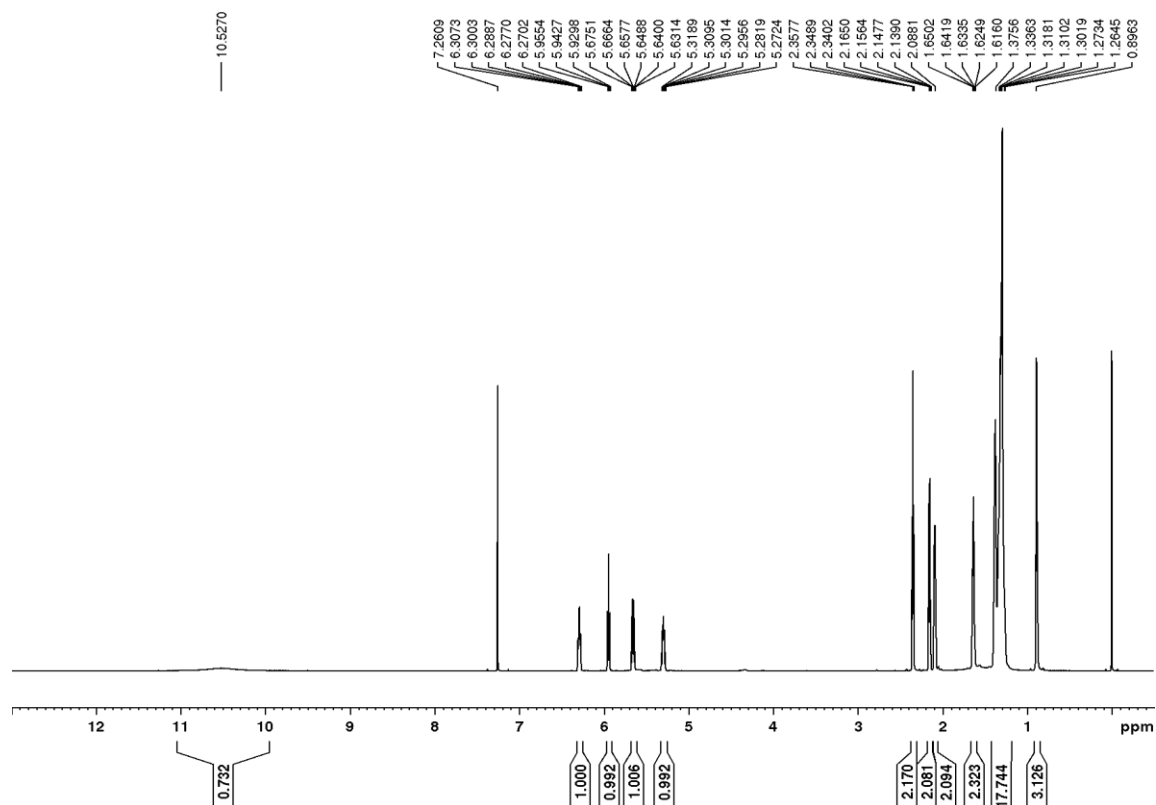

2) LA

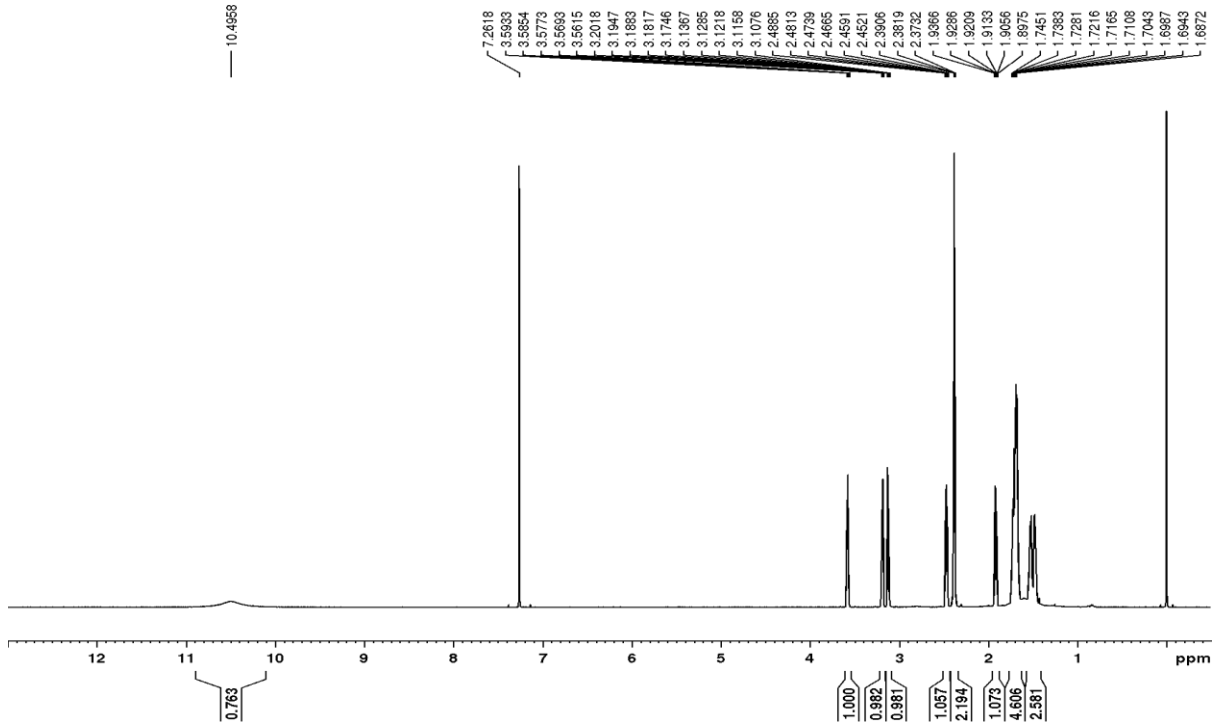

3) CLA:LA=1:1

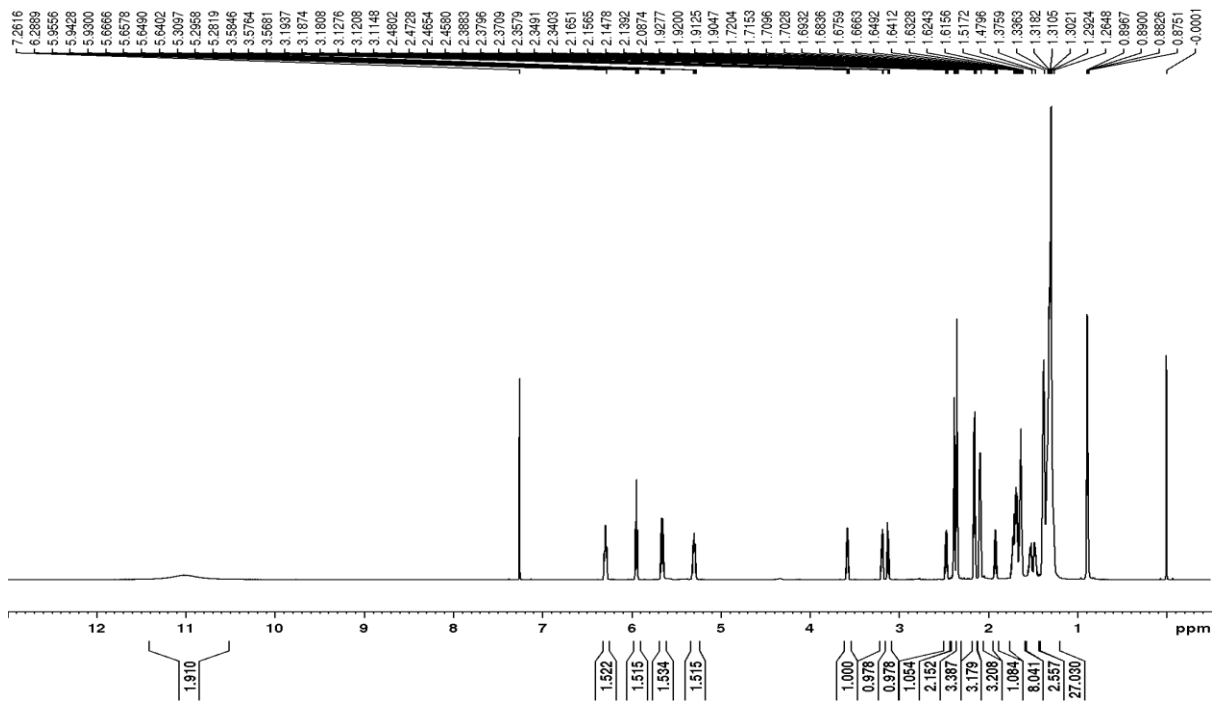

4) CLA:LA=4:1

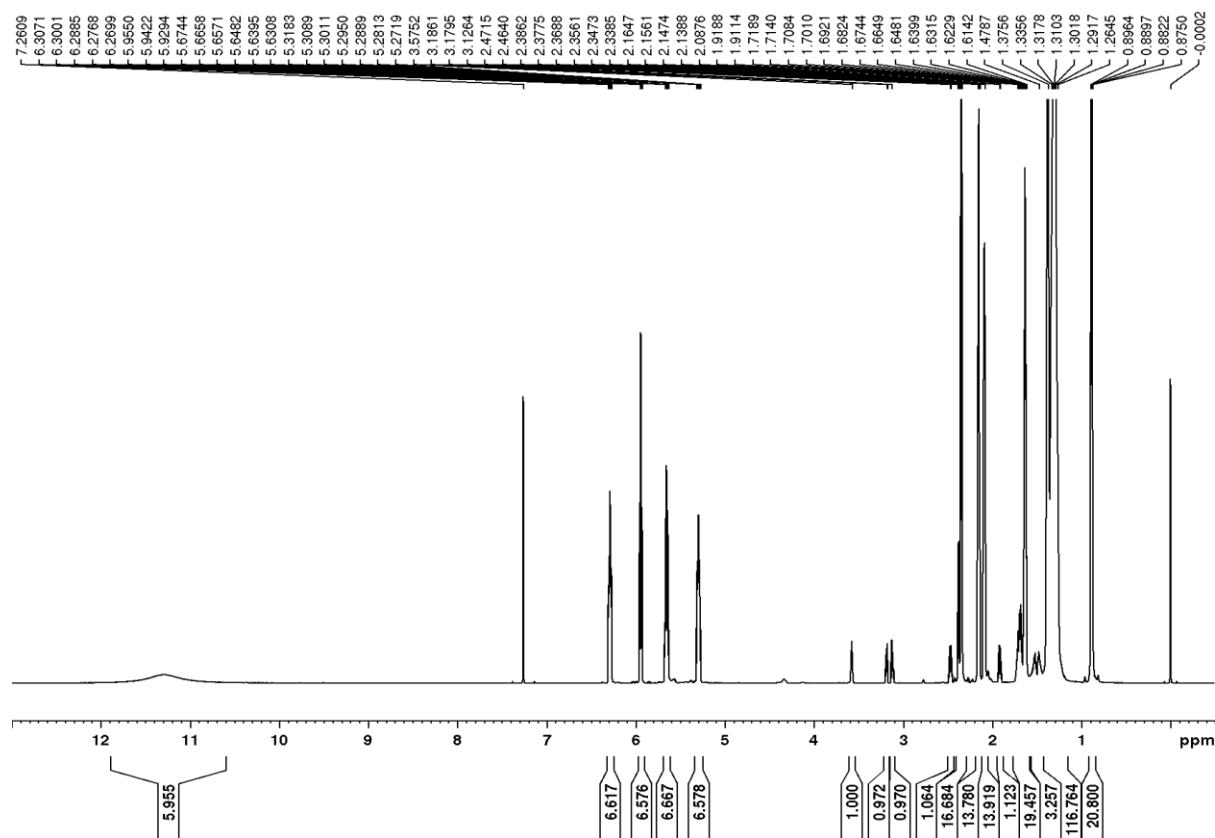

**Sup. 3** The table of LA <sup>1</sup>H NMR chemical shift (CS) and T1 relaxation time at 5°C

| <b># of<br/>Carbon</b> | <b>LA</b>        | <b>CLA:LA=1:1<br/>(mole ratio)</b> | <b>CLA:LA=4:1<br/>(mole ratio)</b> |
|------------------------|------------------|------------------------------------|------------------------------------|
|                        | <b>CS (ppm)</b>  | <b>CS (ppm)</b>                    | <b>CS (ppm)</b>                    |
| <b>Acid-<br/>OH</b>    | 11.0300          | 11.5973                            | 11.7631                            |
| <b>1</b>               |                  |                                    |                                    |
| <b>2</b>               | 2.3926           | 2.3887                             | 2.3884                             |
| <b>3</b>               | 1.7158           | 1.7140                             | 1.7134                             |
| <b>4</b>               | 1.5162<br>1.4751 | 1.5145<br>1.4734                   | 1.5140<br>1.4728                   |
| <b>5</b>               | 1.6788           | 1.6721                             | 1.6713                             |
| <b>6</b>               | 3.5869           | 3.5857                             | 3.5852                             |
| <b>7</b>               | 2.4851<br>1.9249 | 2.4837<br>1.9235                   | 2.4832<br>1.9232                   |
| <b>8</b>               | 3.2017<br>3.1335 | 3.2003<br>3.1323                   | 3.1999<br>3.1316                   |

**Sup. 4** The table of LA <sup>1</sup>H NMR chemical shift (CS) and T1 relaxation time at 20°C

| <b># of<br/>Carbon</b> | <b>LA</b>        | <b>CLA:LA=1:1<br/>(mole ratio)</b> | <b>CLA:LA=4:1<br/>(mole ratio)</b> |
|------------------------|------------------|------------------------------------|------------------------------------|
|                        | <b>CS (ppm)</b>  | <b>CS (ppm)</b>                    | <b>CS (ppm)</b>                    |
| <b>Acid-<br/>OH</b>    | 10.4290          | 11.1593                            | 11.3684                            |
| <b>1</b>               |                  |                                    |                                    |
| <b>2</b>               | 2.3846           | 2.3817                             | 2.3801                             |
| <b>3</b>               | 1.7116           | 1.7098                             | 1.7091                             |
| <b>4</b>               | 1.5181<br>1.4795 | 1.5164<br>1.4778                   | 1.5158<br>1.4771                   |
| <b>5</b>               | 1.6774           | 1.6750                             | 1.6700                             |
| <b>6</b>               | 3.5797           | 3.5784                             | 3.5779                             |
| <b>7</b>               | 2.4737<br>1.9184 | 2.4726<br>1.9176                   | 2.4716<br>1.9171                   |
| <b>8</b>               | 3.1918<br>3.1248 | 3.1907<br>3.1238                   | 3.1901<br>3.1231                   |

**Sup. 5** The table of LA <sup>1</sup>H NMR chemical shift (CS) and T1 relaxation time at 35°C

| <b># of<br/>Carbon</b> | <b>LA<br/>CS (ppm)</b> | <b>CLA:LA=1:1<br/>(mole ratio)<br/>CS (ppm)</b> | <b>CLA:LA=4:1<br/>(mole ratio)<br/>CS (ppm)</b> |
|------------------------|------------------------|-------------------------------------------------|-------------------------------------------------|
| <b>Acid-<br/>OH</b>    | 9.7624                 | 10.6535                                         | 10.9194                                         |
| <b>1</b>               |                        |                                                 |                                                 |
| <b>2</b>               | 2.3783                 | 2.3746                                          | 2.3736                                          |
| <b>3</b>               | 1.7087                 | 1.7071                                          | 1.6997                                          |
| <b>4</b>               | 1.5207<br>1.4847       | 1.5186<br>1.4825                                | 1.5179<br>1.4818                                |
| <b>5</b>               | 1.6807                 | 1.6780                                          | 1.6771                                          |
| <b>6</b>               | 3.5725                 | 3.5720                                          | 3.5715                                          |
| <b>7</b>               | 2.4637<br>1.9140       | 2.4620<br>1.9125                                | 2.4613<br>1.9118                                |
| <b>8</b>               | 3.1827<br>3.1174       | 3.1817<br>3.1159                                | 3.1812<br>3.1154                                |
